# Supplementary material for: Are phosphide nano-cages better than nitride nano-cages? A kinetic, thermodynamic and non-linear optical properties study of alkali metal encapsulated X12Y12 nano-cages
Source: Royal Society of Chemistry journal article supplement (doi:10.1039/c6tc04456e), 2016-01-01
Supplement: c6tc04456e1.pdf [file c6tc04456e1.pdf]

## Supporting Information

### **Are phosphide nano-cages better than nitride nano-cages? A kinetic, thermodynamic and non-linear optical properties study of alkali metal encapsulated $X_{12}Y_{12}$ nano-cages**

Khurshid Ayub

Department of Chemistry, COMSATS Institute of Information Technology, Abbottabad, KPK,  
Pakistan 22060

[Khurshid@ciit.net.pk](mailto:Khurshid@ciit.net.pk)

Table SI-1. Comparison of  $\beta_0$  calculated through two level model and its comparison with hyperpolarizability values obtained at CAM-B3LYP method.

|        | $\alpha$ | $B_0$    | $\Delta E$ | $\Delta\mu$ | $f_0$  | $\frac{\Delta\mu \cdot f_0}{\Delta E^3}$<br>( $\beta_0$ from two level method) | CT    |
|--------|----------|----------|------------|-------------|--------|--------------------------------------------------------------------------------|-------|
| Li@AlN | 571.15   | 453.30   | 1.3829     | 0.1526      | 0.1349 | 156.8122                                                                       | H-L+1 |
| Na@AlN | 577.79   | 35.60    | 1.3914     | 0.0731      | 0.1389 | 75.93627                                                                       | H-L   |
| K@AlN  | 618.64   | 49.34    | 1.3283     | 0.1470      | 0.1186 | 149.8646                                                                       | H-L   |
| Li@AlP | 662.30   | 2922.45  | 1.320      | 2.3077      | 0.0271 | 547.7879                                                                       | H-L+2 |
| Na@AlP | 681.46   | 448.08   | 1.506      | 0.3024      | 0.0355 | 63.31708                                                                       | H-L+2 |
| K@AlP  | 741.57   | 115.90   | 1.5887     | 0.3643      | 0.0431 | 78.88535                                                                       | H-L+5 |
| Li@BN  | 173.30   | 395.46   | 2.3754     | 2.1963      | 0.0202 | 66.6835                                                                        | H-L   |
| Na@BN  | 177.52   | 100.21   | 1.9867     | 2.8438      | 0.026  | 189.9596                                                                       | H-L+2 |
| K@BN   | 188.27   | 120.22   | 1.7919     | 3.1126      | 0.0217 | 236.4979                                                                       | H-L+2 |
| Li@BP  | 376.93   | 15582.64 | 1.2807     | 1.7590      | 0.0289 | 487.5364                                                                       | H-L+2 |
| Na@BP  | 501.64   | 336.26   | 1.4312     | 1.5449      | 0.0336 | 356.7174                                                                       | H-L+5 |
| K@BP   | 989.79   | 564230.9 | 0.7645     | 0.0514      | 0.0077 | 17.84461                                                                       | H-L+5 |

Table SI-2. Vibrational analysis of alkali metal encapsulated AlN nano-cages

| AlN                               |           | Li@AlN                            |           | Na@AlN                            |           | K@AlN                             |           |
|-----------------------------------|-----------|-----------------------------------|-----------|-----------------------------------|-----------|-----------------------------------|-----------|
| Wavenumber<br>(Cm <sup>-1</sup> ) | Intensity |
| 933                               | 674       | 910                               | 23        | 899                               | 21        | 877                               | 11        |
| 895                               | 330       | 865                               | 123       | 853                               | 126       | 829                               | 113       |
| 684                               | 236       | 672                               | 44        | 663                               | 56        | 649                               | 67        |
|                                   | 119       | 656                               | 39        | 640                               | 25        | 628                               | 8         |
| 532                               | 44        | 565                               | 150       | 497                               | 163       | 490                               | 184       |
| 401                               | 155       | -                                 | -         | -                                 | -         | -                                 | -         |
| 318                               | -         | -                                 | -         | 305                               | 7         | 312                               | 7         |
| -                                 | -         | 80                                | 46        | 160                               | 8         | -                                 | -         |
| -                                 | -         | 42                                | 45        | -                                 | -         | -                                 | -         |

Table SI-3. Vibrational analysis of alkali metal encapsulated AIP nano-cages

| AIP                               |           | Li@AIP                            |           | Na@AIP                            |           | K@AIP                             |           |
|-----------------------------------|-----------|-----------------------------------|-----------|-----------------------------------|-----------|-----------------------------------|-----------|
| Wavenumber<br>(Cm <sup>-1</sup> ) | Intensity |
| 530                               | 313       | 538                               | 15        | 512                               | 170       | 495                               | 173       |
| 500                               | 36        | 515                               | 139       | 489                               | 31        | 475                               | 2         |
| 460                               | 34        | 496                               | 48        | 451                               | 26        | 440                               | 16        |
|                                   |           | 460                               | 35        | -                                 | -         | -                                 | -         |
| 340                               | 4         | -                                 | -         | -                                 | -         | 330                               | 9         |
| 222                               | 7         | 201                               | 14        | 217                               | 19        | 267                               | 8         |
| -                                 | -         | 147                               | 16        | 56                                | 32        | -                                 | -         |
| -                                 | -         | 126                               | 16        | 50                                | 32        | -                                 | -         |
| -                                 | -         | 106                               | 6         | 36                                | 30        | -                                 | -         |

Table SI-4. Vibrational analysis of alkali metal encapsulated BN nano-cages

| BN                                |           | Li@BN                             |           | Na@BN                             |           | K@BN                              |           |
|-----------------------------------|-----------|-----------------------------------|-----------|-----------------------------------|-----------|-----------------------------------|-----------|
| Wavenumber<br>(Cm <sup>-1</sup> ) | Intensity |
| 1424                              | 1363      | 1440                              | 194       | 1408                              | 187       | 1311                              | 151       |
|                                   |           | 1413                              | 420       | 1373                              | 303       | 1284                              | 276       |
|                                   |           | 1404                              | 1155      | 1369                              | 1134      | 1271                              | 1074      |
|                                   |           | 1384                              | 966       | 1341                              | 890       | 1244                              | 787       |
|                                   |           | 1347                              | 552       | 1304                              | 485       | 1210                              | 416       |
| 1203                              | 85        | 1272                              | 20        | 1233                              | 22        | 1169                              | 38        |
|                                   |           | 1229                              | 40        | 1186                              | 47        | 1140                              | 16        |
|                                   |           |                                   |           |                                   |           | 1068                              | 131       |
| 808                               | 248       | 838                               | 141       | 846                               | 91        | 866                               | 170       |
| 806                               | 246       | 804                               | 168       | 838                               | 115       | 856                               | 170       |
|                                   |           |                                   |           | 822                               | 127       | 833                               | 31        |
|                                   |           |                                   |           | 799                               | 30        | 764                               | 25        |
|                                   |           |                                   |           |                                   |           | 752                               | 32        |

Table SI-5. Vibrational analysis of alkali metal encapsulated BP nano-cages

| BP                                |           | Li@BP                             |           | Na@BP                             |           | K@BP                              |           |
|-----------------------------------|-----------|-----------------------------------|-----------|-----------------------------------|-----------|-----------------------------------|-----------|
| Wavenumber<br>(Cm <sup>-1</sup> ) | Intensity |
| 894                               | 193       | 870                               | 56        | 860                               | 90        | 834                               | 86        |
| 761                               | 22        | 746                               | 14        | 736                               | 14        | 707                               | 10        |
|                                   |           | 408                               | 24        | 465                               | 11        | 491                               | 5         |
|                                   |           | 456                               | 5         | 421                               | 13        | 425                               | 6         |
|                                   |           | 340                               | 26        | 337                               | 22        | 333                               | 22        |
|                                   |           | 111                               | 41        | 187                               | 7         | 203                               | 3         |
|                                   |           | 87                                | 40        | 181                               | 6         |                                   |           |
|                                   |           | 48                                | 39        | 179                               | 6         |                                   |           |

## The D3 problem of Gaussian 09 for endohedral fullerenes

D3 correction of any method is not possible for endohedral fullerenes in Gaussian 09. Optimization of EMFs fails because of the problem in Gaussian 09 code. A recent communication with Gaussian Inc is also copied.

Hello Khurshid

There is a known problem with some terms in the second derivatives of the D3 dispersion model. In the D3 expressions, there is one term that depend on the “coordination number” of the atoms involved (the "coordination numbers” are determined on-the-fly according to rules given in the model). The analytic expression for the second derivative of such term is not numerically stable for large coordination numbers (~8 or higher), which is going to lead to NaNs (Not-A-Number) in the contributions from D3 to the energy second derivatives. The structures where you find these problems must have one or more centers for which the coordination number is ~8 or higher. Unfortunately then, in such cases, there is no way around this issue in G09 rev. D.01. We have worked out alternative expressions for the D3 second derivatives that can avoid this numerical instability and we hope to have this available in a future release of Gaussian.

Even though the optimization with d3 correction is not possible, attempt has been made to optimize all geometries with B3LYP-D3 and only a few EMFs are successfully optimized, mostly lithium encapsulated ones. The optimization of Li-EMFs is sensible because the lithium atom in some fullerenes is not present at the center rather it is present towards one side where the coordination number of lithium is less than 8. (the purpose of optimization of these EMFs with D3 correction was to get some idea about the thermochemistry and electronic properties)

Table SI-6 Comparison of thermochemistry with wB97XD, B3LYP and B3LYP-D3 using 6-31G(d,p) basis set.

|        | wB97XD                                      |                                           |                                             | B3LYP                                       |                                           |                                             | B3LYP-D3 |
|--------|---------------------------------------------|-------------------------------------------|---------------------------------------------|---------------------------------------------|-------------------------------------------|---------------------------------------------|----------|
|        | E <sub>bind</sub> (Kcal mol <sup>-1</sup> ) | E <sub>BC</sub> (Kcal mol <sup>-1</sup> ) | E <sub>dist</sub> (Kcal mol <sup>-1</sup> ) | E <sub>bind</sub> (Kcal mol <sup>-1</sup> ) | E <sub>BC</sub> (Kcal mol <sup>-1</sup> ) | E <sub>dist</sub> (Kcal mol <sup>-1</sup> ) |          |
| Li@AlN | -2.78                                       | 111                                       | 6.22                                        | -2.92                                       | 97                                        | 8.98                                        | -15.23   |
| Na@AlN | 22.56                                       | 263                                       | 14.4                                        | 22.62                                       | 247                                       | 15.71                                       |          |
| K@AlN  | 71.72                                       | 567                                       | 30.5                                        | 69.02                                       | 518                                       | 30.94                                       |          |
| Li@AlP | -26.06                                      | 31                                        | 10.1                                        | -13.6                                       | 20.1                                      | 9.66                                        | -29.41   |
| Na@AlP | -12.88                                      | 140                                       | 0.1                                         | 1.6                                         | 127.3                                     | 0.77                                        | -17.35   |
| K@AlP  | 17.54                                       | 323                                       | 12.1                                        | 19.71                                       | 278.5                                     | 17.81                                       |          |
| Li@BN  | 48.99                                       | 216                                       | 48.4                                        | 52.08                                       | 191                                       | 44.33                                       |          |
| Na@BN  | 115.66                                      | 697                                       | 56.3                                        | 119.09                                      | 615                                       | 51.95                                       |          |
| K@BN   | 267.5                                       | 1315                                      | 85.2                                        | 273.58                                      | 1109                                      | 81.71                                       |          |
| Li@BP  | -24.54                                      | 85                                        | 0.6                                         | -21.43                                      | 73                                        | 0.87                                        | -37.14   |
| Na@BP  | -3.91                                       | 262                                       | 17.9                                        | -2.84                                       | 255                                       | 3.08                                        |          |
| K@BP   | 38.80                                       | 584                                       | 17.5                                        | 39.27                                       | 492                                       | 13.09                                       |          |

The B3LYP-D3 results show that the formation of these EMFs is more favorable than with B3LYP method (more exothermic or less endothermic). Large differences in binding energies calculated at B3LYP and B3LYP-D3 methods were forcing enough to perform all thermochemistry with some dispersion corrected method.  $\omega$ B97XD method is a better method for coordination chemistry of alkali metals, as revealed from a benchmark study by Carlo Adamo and co-workers<sup>1</sup>. The Study by Adamo reveals that  $\omega$ B97XD is good method not only for interaction energies but also for potential energy surface. The latter is very useful point related to this study because PES surfaces are also scanned for translation of alkali metal into the nano-cage.

A comparison of interaction energies at B3LYP, B3LYP-D3 and  $\omega$ B97XD is given in the table above. The binding energies at B3LYP-D3 are the highest among all whereas those with B3LYP are the lowest. B3LYP-D3 method is known in the literature by our group<sup>2</sup> and others<sup>3,4</sup> to overestimate the binding energies. As the literature reveals that  $\omega$ B97XD provides better results for thermochemistry of alkali metal coordination chemistry, the results with  $\omega$ B97XD are now incorporated in the manuscript.

Although the binding energies are more favorable with dispersion corrected methods; however, the barriers for boundary crossing are increased. B3LYP method underestimated the boundary crossing barriers. Despite the fact that the values are changed with  $\omega$ B97XD however the trends and important findings remain unaltered.

## Electronic properties

The choice of B3LYP method is mainly due to the validity of B3LYP method for electronic properties, not only for these inorganic fullerenes but also for conducting polymers<sup>2,5-8</sup> and other systems<sup>9</sup>. Other functional are generally poor in this regard. A short benchmarking is carried out against experimental data.

The band gap for AlN, AlP, BN and BP are taken from the literature, and appropriate references are given. It is worth mentioning that band gaps for Al<sub>12</sub>N<sub>12</sub>, Al<sub>12</sub>P<sub>12</sub>, B<sub>12</sub>N<sub>12</sub> and B<sub>12</sub>P<sub>12</sub> could not be retrieved from the literature. However, the values for other related forms are taken from the literature. For example, band gaps for hexagonal BN, Cubic BN or BN nano-tubes are considered and all of them lie in the range of 5.5 to 6.5 eV. It is expected that the band gap for B<sub>12</sub>N<sub>12</sub> will lie in the same range or a bit higher.

These materials are semi-conductors and their band gaps are expected in the range of 1.5-6.5 eV. The theoretical values for the band gaps are compared with the experimental data. Except for AlN, the calculated band gaps are overestimated by about 1 eV with B3LYP and B3LYP-D3 methods. The band gap for Aluminum nitride is slightly underestimated with these functionals. Although the band gaps calculated with these functionals are not the perfect match with the experiment (which could be due to slightly different nature of the material taken as reference) however, these are the closest values. A number of strides have been made in the literature in this regard but no other functional is consistently better than B3LYP for the band gaps.

The band gaps calculated with M05-2X deviate from experiment up to 5 eV whereas this number reaches to about 6 eV with  $\omega$ B97XD. The band gaps calculated with these functional suggest that these materials should be insulators which is not the case.



Table SI-7 Comparison of band gaps of (XY)<sub>n</sub> semiconductors calculated with different functionals with experimental values.

| Nano-cage         | Exp       | B3LYP | B3LYP-D3 | M05-2X | $\omega$ B97XD |
|-------------------|-----------|-------|----------|--------|----------------|
| AlN <sup>10</sup> | 5.11      | 3.93  | 3.98     | 8.22   | 9.09           |
| AlP <sup>11</sup> | 2.45      | 3.39  | 3.37     | 7.87   | 7.63           |
| BN <sup>12</sup>  | 5.96-6.36 | 6.85  | 6.86     | 9.49   | 10.58          |
| BP <sup>13</sup>  | 2.4       | 3.70  | 3.74     | 8.08   | 8.38           |

Now comparing band gaps at B3LYP (on B3LYP optimized geometry) with B3LYP-D3 (on B3LYP-D3 optimized geometries) method, one can see that the former is a better match with the experiment (although the difference is negligible). Because of this fact, the discussion on electronic properties is not changed in the resubmitted manuscript. The band gap (and related discussion) is retained at B3LYP/6-31G(d,P) on B3LYP/6-31G(d,p) optimized geometries.

As far as NLO properties are concerned, the literature reveals that the hyperpolarizability values calculated at CAM-B3LYP correlate better with those from coupled cluster calculations. A few other better methods are LC-BLYP, M05-2X, M11L and  $\omega$ B97XD; however the reports in favor of CAM-B3LYP are more than for other methods. Due to this fact, CAM-B3LYP method was used. These important references for CAM-B3LYP are now added into the manuscript.

Since geometries of EMFs are also optimized with  $\omega$ B97XD and B3LYP-D3 (a few of them), hyperpolarizabilities are calculated on all these geometries to see if any big difference could be observed. The hyperpolarizability values at CAM-B3LYP for all these structures are compared in the table below. As one can see that the individual values are changed slightly however the trends are similar. These differences do not influence the results presented in original submission therefore, the original values reported in the first submission are retained whereas the other values are given in the supporting information. And necessary text is added in the manuscript for these values.

Most of the discussion above is also provided in the supporting information for readers.

Table SI-8 calculated electronic properties of alkali metal encapsulated nano-cages. (Bold values are on B3LYP optimized geometries whereas bold and bold italic values are based on  $\omega$ B97XD and B3LYP-D3 optimized geometries, respectively)

| Nano-cage | $E_H$ (eV)           | $E_L$ (eV)          | $\Delta E_{HL}$ (eV) | %_HLG              | $E_{FL}$ (eV)       | A (au)               | $\beta_o$ (au)    |
|-----------|----------------------|---------------------|----------------------|--------------------|---------------------|----------------------|-------------------|
| Li@AlN    | <b>-3.55</b>         | <b>-1.69</b>        | <b>1.86</b>          | <b>47.3</b>        | <b>-2.62</b>        | <b>571.15</b>        | <b>453.30</b>     |
|           | <i>-3.51</i>         | <i>-1.64</i>        | <i>1.87</i>          | <i>46.4</i>        | <i>2.57</i>         | <i>556.9</i>         | <i>720.9</i>      |
|           | <b><i>-3.52*</i></b> | <b><i>-1.69</i></b> | <b><i>1.83</i></b>   | <b><i>46.0</i></b> | <b><i>-2.58</i></b> | <b><i>571.54</i></b> | <b><i>532</i></b> |
| Na@AlN    | <b>-3.55</b>         | <b>-1.7</b>         | <b>1.85</b>          | <b>47.1</b>        | <b>-2.63</b>        | <b>577.79</b>        | <b>35.60</b>      |
|           | <i>-3.50</i>         | <i>-1.64</i>        | <i>1.86</i>          | <i>46.1</i>        | <i>-2.57</i>        | <i>571.1</i>         | <i>25.2</i>       |
| K@AlN     | <b>-3.53</b>         | <b>-1.75</b>        | <b>1.78</b>          | <b>45.3</b>        | <b>-2.64</b>        | <b>618.64</b>        | <b>49.34</b>      |
|           | <i>-3.47</i>         | <i>-1.70</i>        | <i>1.78</i>          | <i>43.9</i>        | <i>-2.58</i>        | <i>622.3</i>         | <i>8.4</i>        |

|        |               |              |             |             |              |               |                 |
|--------|---------------|--------------|-------------|-------------|--------------|---------------|-----------------|
| Li@AlP | <b>-4.73</b>  | <b>-2.97</b> | <b>1.76</b> | <b>51.9</b> | <b>-3.85</b> | <b>662.30</b> | <b>2922.45</b>  |
|        | -4.89         | -2.83        | 2.06        | 60.1        | -3.86        | 647.9         | 3337.5          |
|        | <b>-4.86*</b> | <b>-2.85</b> | <b>2.01</b> | <b>59.6</b> | <b>-3.86</b> | <b>653.7</b>  | <b>3662.0</b>   |
| Na@AlP | <b>-4.58</b>  | <b>-2.8</b>  | <b>1.78</b> | <b>52.5</b> | <b>-3.69</b> | <b>681.46</b> | <b>448.08</b>   |
|        | -4.62         | -2.66        | 1.96        | 57.1        | -3.64        | 668           | 720.6           |
|        | <b>4.62*</b>  | <b>2.70</b>  | <b>1.92</b> | <b>57.0</b> | <b>-3.66</b> | <b>671.57</b> | <b>530.8</b>    |
| K@AlP  | <b>-4.23</b>  | <b>-2.49</b> | <b>1.74</b> | <b>51.3</b> | <b>-3.36</b> | <b>741.57</b> | <b>115.90</b>   |
|        | -4.08         | -2.4         | 1.68        | 49.0        | -3.24        | 725.2         | 170.8           |
| Li@BN  | <b>-4.02</b>  | <b>-1.38</b> | <b>2.64</b> | <b>38.5</b> | <b>-2.7</b>  | <b>173.30</b> | <b>395.46</b>   |
|        | -4.06         | -1.33        | 2.73        | 39.3        | -2.69        | 171.6         | 425.7           |
| Na@BN  | <b>-3.84</b>  | <b>-1.59</b> | <b>2.25</b> | <b>32.8</b> | <b>-2.72</b> | <b>177.52</b> | <b>100.21</b>   |
|        | -3.92         | -1.53        | 2.39        | 34.3        | -2.72        | 175.1         | 181.8           |
| K@BN   | <b>-3.97</b>  | <b>-1.92</b> | <b>2.05</b> | <b>29.9</b> | <b>-2.95</b> | <b>188.27</b> | <b>120.22</b>   |
|        | -4.04         | -1.86        | 2.18        | 31.3        | -2.95        | 185.5         | 87.9            |
| Li@BP  | <b>-4.19</b>  | <b>-2.69</b> | <b>1.5</b>  | <b>40.5</b> | <b>-3.44</b> | <b>376.93</b> | <b>15582.64</b> |
|        | -4.18         | -2.67        | 1.51        | 40.5        | -3.42        | 374.6         | 11540.8         |
|        | <b>-4.15*</b> | <b>-2.67</b> | <b>1.48</b> | <b>39.5</b> | <b>-3.41</b> | <b>370.5</b>  | <b>10445</b>    |
| Na@BP  | <b>-4.14</b>  | <b>-2.77</b> | <b>1.37</b> | <b>37</b>   | <b>-3.46</b> | <b>501.64</b> | <b>336.26</b>   |
|        | -4.15         | -3.25        | 0.9         | 24.2        | -3.70        | 421           | 1214            |
| K@BP   | <b>-3.66</b>  | <b>-3.26</b> | <b>0.40</b> | <b>10.8</b> | <b>-3.48</b> | <b>989.79</b> | <b>564230.9</b> |
|        | -3.92         | -3.15        | 0.78        | 20.8        | -3.54        | 410.2         | 4614.6          |

\* Band gaps are calculated at B3LYP-D3/6-31G(d,p)

## Notes and References

- 1 M. Savarese, É. Brémond and C. Adamo, *Theor. Chem. Acc.*, 2016, **135**, 99.
- 2 F. Wasim, T. Mahmood and K. Ayub, *Phys. Chem. Chem. Phys.*, 2016, **18**, 19236–19247.
- 3 L. A. Burns, A. V.- Mayagoitia, B. G. Sumpter and C. D. Sherrill, *J. Chem. Phys.*, 2011, **134**, 084107.
- 4 J. G. Brandenburg, M. Alessio, B. Civalleri, M. F. Peintinger, T. Bredow and S. Grimme, *J. Phys. Chem. A*, 2013, **117**, 9282–9292.
- 5 S. Bibi, H. Ullah, S. M. Ahmad, A.-U.-H. Ali Shah, S. Bilal, A. A. Tahir and K. Ayub, *J. Phys. Chem. C*, 2015, **119**, 15994–16003.
- 6 H. Ullah, A.-H. A. Shah, S. Bilal and K. Ayub, *J. Phys. Chem. C*, 2013, **117**, 23701–23711.
- 7 H. Ullah, A.-H. A. Shah, K. Ayub and S. Bilal, *J. Phys. Chem. C*, 2013, **117**, 4069–4078.
- 8 H. Ullah, A.-H. A. Shah, S. Bilal and K. Ayub, *J. Phys. Chem. C*, 2014, **118**, 17819–17830.
- 9 D. Düzenli, *J. Phys. Chem. C*, 2016, **120**, 20149–20157.
- 10 W. G. Aulbur, M. Städele and A. Görling, *Phys. Rev. B*, 2000, **62**, 7121–7132.
- 11 D. Richman, *J. Electrochem. Soc.*, 1968, **115**, 945.
- 12 D. A. Evans, A. G. McGlynn, B. M. Towlson, M. Gunn, D. Jones, T. E. Jenkins, R. Winter and N. R. J. Poolton, *J. Phys. Condens. Matter*, 2008, **20**, 075233.
- 13 C. Prasad and M. Sahay, *Phys. Stat. SOL.*, 1989, **154**, 201.

Note: To obtain barriers for boundary crossing, initial geometries are those obtained at B3LYP/6-31G(d,p)

Table SI-9 Total, ZP and Gibbs energies of optimized geometries at B3LYP/6-31G(d,p)

| File Name | SCF Energy (A.U) | SCF Energy (Kcal) | ZP Energy (A.U) | ZP Energy (Kcal) | Gibbs Free E (A.U) | Gibbs Free E (Kcal) |
|-----------|------------------|-------------------|-----------------|------------------|--------------------|---------------------|
| Li@AlN    | -3574.739182     | -2243182.797      | -3574.66287     | -2243134.91      | -3574.713032       | -2243166.387        |
| Na@AlN    | -3729.487371     | -2340288.755      | -3729.410868    | -2340240.749     | -3729.458858       | -2340270.863        |
| K@AlN     | -4167.023958     | -2614847.12       | -4166.947524    | -2614799.157     | -4166.99428        | -2614828.497        |
| Li@AlP    | -7013.82778      | -4401243.563      | -7013.7828      | -4401215.338     | -7013.846373       | -4401255.231        |
| Na@AlP    | -7168.59229      | -4498359.764      | -7168.548577    | -4498332.333     | -7168.614671       | -4498373.808        |
| K@AlP     | -7606.174136     | -4772946.529      | -7606.130615    | -4772919.219     | -7606.195376       | -4772959.857        |
| Li@BN     | -963.5534521     | -604638.9449      | -963.425201     | -604558.4662     | -963.461564        | -604581.2843        |
| Na@BN     | -1118.235546     | -701703.4282      | -1118.108169    | -701623.4981     | -1118.144226       | -701646.1242        |
| K@BN      | -1555.599896     | -976153.7132      | -1555.47633     | -976076.1741     | -1555.512198       | -976098.6816        |
| Li@BP     | -4402.179334     | -2762409.353      | -4402.106129    | -2762363.416     | -4402.156948       | -2762395.305        |
| Na@BP     | -4556.938605     | -2859522.266      | -4556.864637    | -2859475.85      | -4556.913352       | -2859506.419        |
| K@BP      | -4994.482032     | -3134084.923      | -4994.408451    | -3134038.75      | -4994.456519       | -3134068.913        |
| Li        | -7.490984665     | -4700.664042      | -7.490985       | -4700.664252     | -7.504387          | -4709.074134        |
| Na        | -599.890422      | -376436.9388      | -599.890422     | -376436.9388     | -599.906252        | -376446.8722        |
| K         | -162.2798806     | -101832.1667      | -162.279881     | -101832.167      | -162.294964        | -101841.6317        |
| AlN       | -3567.243534     | -2238479.207      | -3567.164786    | -2238429.791     | -3567.209395       | -2238457.784        |
| AlP       | -7006.315116     | -4396529.295      | -7006.270558    | -4396501.335     | -7006.330064       | -4396538.675        |
| BN        | -956.1454622     | -599990.3609      | -956.016405     | -599909.3763     | -956.051288        | -599931.2657        |
| BP        | -4394.654195     | -2757687.256      | -4394.579849    | -2757640.604     | -4394.625588       | -2757669.305        |

### Cartesian Coordinates of Optimized Geometries at B3LYP/6-31G(d,P)

Li@AlN

|    |             |             |             |
|----|-------------|-------------|-------------|
| Al | -1.66003500 | 2.27101200  | 0.39186900  |
| Al | -2.05812400 | 0.92076900  | -1.72981100 |
| Al | 0.75424300  | 2.24308300  | -1.57084300 |
| Al | -2.61772100 | -0.64184800 | 0.89961800  |
| Al | -0.44775100 | 0.62505200  | 2.73342500  |
| Al | 1.24044400  | 2.07140800  | 1.49316000  |
| Al | 0.44810100  | -0.62506400 | -2.73515200 |
| N  | -1.96211800 | -2.21955900 | 0.15082900  |
| N  | -2.83494900 | 0.88556900  | -0.03375200 |
| N  | -1.53780300 | -0.77578800 | 2.41517000  |
| N  | -1.02635600 | 2.42891700  | -1.35506400 |
| N  | -0.58368700 | 2.25561700  | 1.83758300  |
| N  | 1.96405600  | 2.22262200  | -0.15122300 |
| N  | 1.53736600  | 0.77597500  | -2.41462300 |
| N  | -1.40689500 | -0.54563300 | -2.55283900 |
| Al | 1.66217900  | -2.27259700 | -0.39088700 |
| Al | 2.05763400  | -0.92051400 | 1.73079800  |
| N  | 1.02673900  | -2.42921700 | 1.35603200  |
| N  | 2.83313000  | -0.88377100 | 0.03428800  |
| N  | 0.58357600  | -2.25367900 | -1.83545300 |
| N  | 1.40678300  | 0.54569900  | 2.55312000  |
| Al | -0.75425000 | -2.24307700 | 1.57178300  |
| Al | 2.61756300  | 0.64353600  | -0.89931100 |
| Li | -0.00129000 | -0.01141200 | -0.00560600 |
| Al | -1.24190200 | -2.07276000 | -1.49554600 |

Na@AlN

|    |             |             |             |
|----|-------------|-------------|-------------|
| Al | 1.96358900  | -1.52888800 | 1.41699700  |
| Al | -0.42167100 | -2.46896400 | 1.38789600  |
| Al | -0.15061700 | 0.29634900  | 2.84397400  |
| Al | 0.92284900  | -2.29681500 | -1.43949600 |
| Al | 2.65111900  | 0.28992200  | -1.04415200 |
| Al | 2.11443000  | 1.58734500  | 1.10103000  |
| Al | -2.65076900 | -0.29009800 | 1.04405500  |
| N  | -0.71278000 | -1.83048900 | -2.21652900 |
| N  | 1.07833200  | -2.74410700 | 0.30592500  |
| N  | 1.81698800  | -0.83520700 | -2.18858600 |
| N  | 0.50781700  | -1.36726000 | 2.57903600  |
| N  | 2.85970200  | -0.09587200 | 0.77351800  |
| N  | 0.71328900  | 1.83189600  | 2.21808600  |
| N  | -1.81638700 | 0.83511800  | 2.18807100  |
| N  | -2.04134400 | -2.02664300 | 0.71489600  |
| Al | -1.96347800 | 1.52851200  | -1.41728300 |
| Al | 0.42155800  | 2.46883800  | -1.38830100 |
| N  | -0.50791300 | 1.36747200  | -2.57966900 |
| N  | -1.07822500 | 2.74366800  | -0.30602900 |
| N  | -2.85987900 | 0.09582900  | -0.77366400 |
| N  | 2.04092700  | 2.02603300  | -0.71475500 |
| Al | 0.15101300  | -0.29596400 | -2.84398900 |
| Al | -0.92255300 | 2.29717600  | 1.43968300  |
| Na | -0.00053400 | 0.00017300  | 0.00045000  |
| Al | -2.11530400 | -1.58779400 | -1.10095600 |

K@AlN

|    |             |             |             |
|----|-------------|-------------|-------------|
| Al | -0.90399900 | -1.23285500 | -2.46457800 |
| Al | -2.38404500 | -1.60967800 | -0.37393600 |
| Al | 0.53341600  | -2.84751400 | -0.13449100 |
| Al | -2.17445700 | 1.43047500  | -1.28142100 |
| Al | 0.80856400  | 1.44401200  | -2.38229600 |
| Al | 2.15897600  | -0.69022500 | -1.80886000 |
| Al | -0.80875400 | -1.44338500 | 2.38205500  |
| N  | -2.14948100 | 1.97067300  | 0.51636300  |
| N  | -2.37509500 | -0.31987300 | -1.73887500 |
| N  | -0.59484000 | 2.36570700  | -1.67944600 |
| N  | -0.95749500 | -2.56179900 | -1.13868600 |
| N  | 0.64334900  | -0.36279100 | -2.86753700 |
| N  | 2.15041100  | -1.97191400 | -0.51606800 |
| N  | 0.59440300  | -2.36499200 | 1.67921900  |
| N  | -2.36621700 | -1.12679200 | 1.38116500  |
| Al | 0.90445200  | 1.23264500  | 2.46428900  |
| Al | 2.38434700  | 1.60945500  | 0.37358700  |
| N  | 0.95718500  | 2.56018300  | 1.13755400  |
| N  | 2.37691600  | 0.32010200  | 1.73958600  |
| N  | -0.64304800 | 0.36336700  | 2.86853400  |
| N  | 2.36572200  | 1.12656100  | -1.38136900 |
| Al | -0.53415800 | 2.84778400  | 0.13462900  |
| Al | 2.17390800  | -1.43001600 | 1.28189100  |
| K  | 0.00001400  | 0.00027600  | -0.00077700 |
| Al | -2.15924400 | 0.68974400  | 1.81003100  |

Li@AIP

|    |            |             |            |
|----|------------|-------------|------------|
| Al | 0.78758600 | -1.84613700 | 2.42944100 |
|----|------------|-------------|------------|

|    |             |             |             |
|----|-------------|-------------|-------------|
| Al | -1.30685700 | -2.76678700 | 0.81070600  |
| Al | -1.97809000 | 0.23951000  | 2.44067800  |
| Al | 1.78056500  | -2.54162500 | -0.77714700 |
| Al | 3.05332300  | 0.24785100  | 0.80495300  |
| Al | 1.21111600  | 1.59143900  | 2.43605300  |
| Al | -1.36541900 | -1.74518500 | -2.54480500 |
| Al | -3.09531200 | -0.27045700 | -0.75909200 |
| Al | -0.84380000 | 2.05483900  | -2.53728000 |
| Al | 1.30845300  | 2.81593200  | -0.76523700 |
| Al | 2.18771400  | -0.29439500 | -2.55031000 |
| Al | -1.73831900 | 2.51464600  | 0.82241400  |
| P  | 3.67198700  | -1.13481400 | -0.95930600 |
| P  | 1.45988300  | 1.86430400  | -2.90429300 |
| P  | 2.77249500  | 2.58231400  | 0.97234600  |
| P  | -0.91171100 | 2.25887900  | 3.00398700  |
| P  | -0.85569400 | 3.75209300  | -0.93723600 |
| P  | -3.62102800 | 1.10520300  | 0.98702600  |
| P  | -1.49336300 | -1.93550100 | 2.99724200  |
| P  | -2.35143300 | 0.34787500  | -2.89675800 |
| P  | 0.85566100  | -3.69325700 | 0.96492200  |
| P  | -2.82423100 | -2.61173400 | -0.94436600 |
| P  | 0.86680200  | -2.19272700 | -2.90946100 |
| P  | 2.43047700  | -0.34213500 | 2.98940900  |
| Li | -0.00338700 | -0.00089800 | -0.99583800 |

Na@AIP

|    |             |             |             |
|----|-------------|-------------|-------------|
| Al | -0.96673400 | -0.87290800 | -2.97626100 |
| Al | 1.22315300  | 0.97445700  | -2.85133900 |



|    |             |             |             |
|----|-------------|-------------|-------------|
| Al | -1.81394900 | 2.25162100  | -1.47591300 |
| Al | 1.94589200  | -2.21175600 | -1.38788000 |
| Al | -1.30720800 | -2.97508600 | -0.10920200 |
| Al | -3.14752300 | -0.77941700 | -0.15385400 |
| Al | 3.15672900  | 0.78719600  | 0.15370700  |
| Al | 1.30174900  | 2.97663900  | 0.10828700  |
| Al | 0.96224500  | 0.87577500  | 2.98015700  |
| Al | -1.22685300 | -0.97141300 | 2.84793400  |
| Al | 1.81749600  | -2.25982400 | 1.48071600  |
| Al | -1.94220000 | 2.20356800  | 1.38362400  |
| P  | 0.85242000  | -3.78744500 | -0.02640400 |
| P  | 0.99723500  | -1.42555600 | 3.46931900  |
| P  | -2.71296900 | -2.25008500 | 1.63195600  |
| P  | -3.58953100 | 1.48485400  | -0.13512100 |
| P  | -1.30807300 | 1.31069600  | 3.41536800  |
| P  | -0.85559300 | 3.78889800  | 0.02655000  |
| P  | -1.00042900 | 1.42700700  | -3.47237300 |
| P  | 2.54987100  | 2.18998400  | 1.94166400  |
| P  | 1.30424900  | -1.30933000 | -3.41173500 |
| P  | 2.70955100  | 2.25174900  | -1.63254700 |
| P  | 3.58381300  | -1.48116300 | 0.13502900  |
| P  | -2.55456400 | -2.18928800 | -1.94261700 |
| Na | 0.02944800  | -0.01272000 | 0.00126800  |

K@AIP

|    |             |             |             |
|----|-------------|-------------|-------------|
| Al | -3.02057600 | -0.67713800 | -1.35677500 |
| Al | -0.72362300 | -2.14512200 | -2.51161400 |
| Al | -0.50547100 | 1.54008900  | -2.96172300 |

|    |             |             |             |
|----|-------------|-------------|-------------|
| Al | -1.32150800 | -2.92081900 | 1.08573700  |
| Al | -2.55881100 | 0.42169700  | 2.16967400  |
| Al | -2.15839600 | 2.58949200  | 0.19636600  |
| Al | 2.16567800  | -2.59499600 | -0.19989900 |
| Al | 2.55714600  | -0.41872300 | -2.17078600 |
| Al | 3.02281000  | 0.68317600  | 1.35514400  |
| Al | 0.72231700  | 2.14828400  | 2.50623500  |
| Al | 0.50445800  | -1.54256800 | 2.97002900  |
| Al | 1.31622500  | 2.91530800  | -1.08180500 |
| P  | -1.84927400 | -1.63450700 | 2.98671200  |
| P  | 1.87625400  | 0.28852500  | 3.37417200  |
| P  | -1.56745900 | 2.53597700  | 2.47503200  |
| P  | -0.92813500 | 3.40999600  | -1.59450300 |
| P  | 2.35774000  | 2.91366600  | 0.99424700  |
| P  | 1.84716100  | 1.63685700  | -2.98630300 |
| P  | -1.87909400 | -0.28528000 | -3.37916800 |
| P  | 3.76966800  | -0.86997800 | -0.20296100 |
| P  | -2.35617200 | -2.90687700 | -0.99476100 |
| P  | 1.56686100  | -2.53288300 | -2.47736700 |
| P  | 0.92687800  | -3.40534000 | 1.59224100  |
| P  | -3.77075400 | 0.87365500  | 0.20105100  |
| K  | 0.00482500  | -0.01789400 | 0.00876500  |

Li@BN

|   |             |             |             |
|---|-------------|-------------|-------------|
| N | 1.88394800  | -0.91996400 | 1.11656100  |
| N | 1.87898300  | 1.42944200  | 0.00001300  |
| N | 1.88257900  | -0.91819600 | -1.11977700 |
| N | -0.13463400 | 2.42502100  | 0.00185100  |

|    |             |             |             |
|----|-------------|-------------|-------------|
| N  | 0.46478700  | 1.00947900  | -2.11178700 |
| N  | -1.93644500 | 0.91404700  | -1.12123700 |
| N  | -1.93523900 | 0.91240800  | 1.12463800  |
| N  | 0.46712800  | 1.00639200  | 2.11275400  |
| N  | 0.07684900  | -2.39919500 | -0.00179000 |
| N  | -1.95724300 | -1.43583600 | 0.00000300  |
| N  | -0.50438800 | -1.01802800 | 2.11879700  |
| N  | -0.50671900 | -1.01497000 | -2.11981500 |
| B  | 0.88780000  | -0.44158500 | 1.99661300  |
| B  | 0.85413800  | 1.81621100  | 0.96937500  |
| B  | -0.88946100 | 0.41422200  | 1.98969700  |
| B  | -0.87912800 | -1.80342900 | 0.97065600  |
| B  | -1.39428800 | 1.74298000  | 0.00202000  |
| B  | -2.23205200 | -0.02052800 | 0.00119000  |
| B  | -0.89163800 | 0.41712300  | -1.98811700 |
| B  | -0.88015200 | -1.80201600 | -0.97235400 |
| B  | 0.85308900  | 1.81764100  | -0.96766000 |
| B  | 0.88555900  | -0.43865400 | -1.99820900 |
| B  | 1.38912800  | -1.73589200 | -0.00192100 |
| B  | 2.55675600  | 0.04081100  | -0.00148500 |
| Li | 0.31466800  | 0.01045900  | -0.00016200 |

Na@BN

|   |             |             |             |
|---|-------------|-------------|-------------|
| N | -1.86462700 | -0.98515700 | -1.12664400 |
| N | -1.93548000 | 1.39200000  | 0.00076700  |
| N | -1.86511700 | -0.98726000 | 1.12464100  |
| N | 0.05980000  | 2.43063600  | 0.00198900  |
| N | -0.50158800 | 0.99237500  | 2.12418200  |

|    |             |             |             |
|----|-------------|-------------|-------------|
| N  | 1.90544000  | 0.97241900  | 1.12569400  |
| N  | 1.90577000  | 0.97413700  | -1.12332000 |
| N  | -0.50073900 | 0.99581600  | -2.12289300 |
| N  | -0.00074700 | -2.41139900 | -0.00190800 |
| N  | 1.99944100  | -1.37541000 | -0.00072300 |
| N  | 0.53574900  | -1.00227100 | -2.12513900 |
| N  | 0.53503000  | -1.00555700 | 2.12369400  |
| B  | -0.89018100 | -0.47401800 | -2.01773800 |
| B  | -0.92558500 | 1.80853600  | -0.97874300 |
| B  | 0.88523200  | 0.45180800  | -2.02507700 |
| B  | 0.94406600  | -1.80359700 | -0.98932300 |
| B  | 1.35812100  | 1.81899500  | 0.00171000  |
| B  | 2.26424100  | 0.04894300  | 0.00056800  |
| B  | 0.88438100  | 0.44870400  | 2.02602900  |
| B  | 0.94379700  | -1.80513000 | 0.98682000  |
| B  | -0.92611400 | 1.80696000  | 0.98134900  |
| B  | -0.89093200 | -0.47730500 | 2.01667600  |
| B  | -1.34946900 | -1.78929900 | -0.00154500 |
| B  | -2.54854100 | -0.03447900 | -0.00062600 |
| Na | -0.05960100 | 0.00610000  | -0.00026200 |

#### K@BN

|   |             |             |             |
|---|-------------|-------------|-------------|
| N | 1.79914100  | 1.63680200  | -0.00000100 |
| N | 0.40402700  | 1.05139800  | 2.15582600  |
| N | -0.31788900 | 2.44106800  | 0.00001600  |
| N | -0.43075000 | -1.06357600 | 2.15351000  |
| N | -2.01988100 | 0.78101300  | 1.13567000  |
| N | -1.86184200 | -1.59382100 | 0.00000400  |

|   |             |             |             |
|---|-------------|-------------|-------------|
| N | 0.24844100  | -2.43220500 | -0.00001600 |
| N | 1.98320200  | -0.81392000 | 1.14307200  |
| N | 0.40399700  | 1.05142500  | -2.15582100 |
| N | -0.43078400 | -1.06354700 | -2.15351500 |
| N | 1.98318700  | -0.81390700 | -1.14311600 |
| N | -2.01989900 | 0.78103300  | -1.13563000 |
| B | 2.55547000  | 0.23513000  | -0.00000800 |
| B | 0.95972900  | -0.39724400 | 2.06375900  |
| B | 1.56465300  | -1.68915600 | -0.00002500 |
| B | 0.95969900  | -0.39722100 | -2.06377800 |
| B | -0.76675500 | -1.93232000 | 1.01124700  |
| B | -0.76677400 | -1.93230800 | -1.01125900 |
| B | -2.30261000 | -0.18949900 | 0.00001600  |
| B | -0.94353700 | 0.36641300  | -2.06969400 |
| B | -0.94350700 | 0.36638500  | 2.06971300  |
| B | -1.57377300 | 1.70707200  | 0.00002200  |
| B | 0.74639700  | 1.94380500  | -1.00439800 |
| B | 0.74641000  | 1.94379500  | 1.00441200  |
| K | 0.03349100  | 0.00754700  | -0.00000200 |

Li@BP

|   |             |             |             |
|---|-------------|-------------|-------------|
| B | 0.99087300  | -1.50153500 | -2.05952900 |
| B | 0.57581300  | -2.57273200 | 0.72223700  |
| B | -1.31740400 | -1.86393600 | -1.50832800 |
| B | -0.73469300 | 0.93189800  | -2.46240200 |
| B | -2.04262200 | -1.22515200 | 1.34340000  |
| B | -2.68266800 | 0.48650000  | -0.21221900 |
| B | -0.98842300 | 1.50046500  | 2.05755300  |

|    |             |             |             |
|----|-------------|-------------|-------------|
| B  | -0.57471200 | 2.57212000  | -0.72080200 |
| B  | 0.73479700  | -0.92981100 | 2.46168800  |
| B  | 1.31543700  | 1.86084200  | 1.50602900  |
| B  | 2.04149500  | 1.22500300  | -1.34145500 |
| B  | 2.68108100  | -0.48507100 | 0.21269100  |
| P  | -2.83313400 | -1.43695000 | -0.41545200 |
| P  | -2.63788200 | 0.58115100  | 1.72447100  |
| P  | -0.65830400 | -2.25060600 | 2.18340000  |
| P  | 0.20424700  | -2.99888000 | -1.10937600 |
| P  | -0.58197300 | -0.89604800 | -3.01990900 |
| P  | 2.17639100  | -1.80740800 | 1.50570300  |
| P  | 2.63774100  | -0.58083800 | -1.72415700 |
| P  | 2.83477800  | 1.43778000  | 0.41570900  |
| P  | 0.65854000  | 2.25171100  | -2.18320600 |
| P  | -2.17596800 | 1.80784700  | -1.50483900 |
| P  | -0.20374600 | 3.00002700  | 1.10994900  |
| P  | 0.58268000  | 0.89689200  | 3.02148100  |
| Li | -0.01514000 | -0.02104600 | -0.01697400 |

Na@BP

|   |             |             |             |
|---|-------------|-------------|-------------|
| B | 2.70858000  | -0.44244800 | 0.29149600  |
| B | 1.35201000  | -0.08806600 | -2.40198100 |
| B | 2.04628600  | 1.84571200  | -0.16489200 |
| B | 0.96836600  | 0.77101100  | 2.46341200  |
| B | -0.58576700 | 2.12688800  | -1.65536600 |
| B | -0.77346100 | 2.54701800  | 0.72341700  |
| B | -2.70661000 | 0.43937800  | -0.29096300 |
| B | -1.35324000 | 0.08570800  | 2.40015900  |

|    |             |             |             |
|----|-------------|-------------|-------------|
| B  | -0.97025300 | -0.77263200 | -2.46097200 |
| B  | -2.04335400 | -1.84322100 | 0.16448400  |
| B  | 0.58255500  | -2.12685400 | 1.65385500  |
| B  | 0.77002900  | -2.54674200 | -0.72247000 |
| P  | 0.63268400  | 3.10587600  | -0.49848400 |
| P  | -2.19488400 | 2.27133300  | -0.57387200 |
| P  | -0.18378700 | 0.89587300  | -3.07569600 |
| P  | 2.84688000  | 0.55067300  | -1.37507900 |
| P  | 2.61875200  | 1.06207600  | 1.52060700  |
| P  | 0.62270800  | -1.88598400 | -2.52162400 |
| P  | 2.19289300  | -2.27239500 | 0.57388800  |
| P  | -0.63450000 | -3.10807900 | 0.49874700  |
| P  | 0.18172900  | -0.89758800 | 3.07628500  |
| P  | -0.62484300 | 1.88431100  | 2.52161900  |
| P  | -2.84817800 | -0.55236900 | 1.37522000  |
| P  | -2.62065400 | -1.06391600 | -1.52071600 |
| Na | 0.01748000  | 0.01582200  | -0.00130300 |

### **K@BP**

|   |             |             |             |
|---|-------------|-------------|-------------|
| B | -1.09493700 | 2.56855700  | 0.32685700  |
| B | -0.14573900 | 0.81299500  | 2.68623700  |
| B | 1.37244200  | 2.39927300  | 0.51215900  |
| B | 0.28306600  | 1.62737700  | -2.27414200 |
| B | 2.40485800  | -0.37228000 | 1.40699400  |
| B | 2.61550800  | 0.02775900  | -1.03018000 |
| B | 1.09447700  | -2.56886400 | -0.32691900 |
| B | 0.14628500  | -0.81300200 | -2.68604100 |

|   |             |             |             |
|---|-------------|-------------|-------------|
| B | -0.28254300 | -1.62757900 | 2.27416500  |
| B | -1.37291600 | -2.39883700 | -0.51215000 |
| B | -2.40526300 | 0.37230100  | -1.40699800 |
| B | -2.61565100 | -0.02756900 | 1.02917000  |
| P | 2.93485900  | 1.25702300  | 0.45950500  |
| P | 2.77220700  | -1.64875800 | -0.03088900 |
| P | 1.22436900  | -0.56351400 | 2.92966200  |
| P | 0.03261700  | 2.58469400  | 1.92770000  |
| P | 0.28327200  | 3.06123700  | -0.97337700 |
| P | -1.71138700 | -0.36183700 | 2.70820700  |
| P | -2.77282800 | 1.64908600  | 0.03070400  |
| P | -2.93556400 | -1.25719500 | -0.45977800 |
| P | -1.22383300 | 0.56324000  | -2.92840500 |
| P | 1.71210100  | 0.36192500  | -2.70914300 |
| P | -0.03280800 | -2.58474600 | -1.92741700 |
| P | -0.28350600 | -3.06125400 | 0.97355400  |
| K | 0.00050300  | 0.00004400  | -0.00003200 |



Table SI-10 Total, ZP and Gibbs free energies of the structures optimized at wB97XD/6-31G(d,P)

| File Name | SCF Energy<br>(A.U) | SCF Energy<br>(Kcal) | ZP Energy<br>(A.U) | ZP Energy<br>(Kcal) | Gibbs Free E<br>(A.U) | Gibbs Free E<br>(Kcal) |
|-----------|---------------------|----------------------|--------------------|---------------------|-----------------------|------------------------|
| Li@AlN    | -3574.248339        | -2242874.788         | -3574.168395       | -2242824.622        | -3574.216056          | -2242854.53            |
| Na@AlN    | -3728.970568        | -2339964.457         | -3728.891231       | -2339914.672        | -3728.938216          | -2339944.155           |
| K@AlN     | -4166.511685        | -2614525.664         | -4166.433717       | -2614476.739        | -4166.480176          | -2614505.892           |
| Li@AlP    | -7013.401166        | -4400975.859         | -7013.353498       | -4400945.947        | -7013.415655          | -4400984.951           |
| Na@AlP    | -7168.142768        | -4498077.685         | -7168.096743       | -4498048.803        | -7168.156963          | -4498086.592           |
| K@AlP     | -7605.713743        | -4772657.628         | -7605.668116       | -4772628.997        | -7605.732037          | -4772669.108           |
| Li@BN     | -963.2939362        | -604476.0962         | -963.162072        | -604393.3502        | -963.198225           | -604416.0366           |
| Na@BN     | -1117.950316        | -701524.4441         | -1117.819328       | -701442.2476        | -1117.855245          | -701464.7859           |
| K@BN      | -1555.327792        | -975982.9653         | -1555.200143       | -975902.8641        | -1555.235846          | -975925.2681           |
| Li@BP     | -4401.885966        | -2762225.262         | -4401.811215       | -2762178.355        | -4401.858427          | -2762207.981           |
| Na@BP     | -4556.615725        | -2859319.655         | -4556.538496       | -2859271.193        | -4556.586787          | -2859301.496           |
| K@BP      | -4994.167097        | -3133887.298         | -4994.087965       | -3133837.642        | -4994.134822          | -3133867.045           |
| AlN       | -3566.754278        | -2238172.194         | -3566.672665       | -2238120.981        | -3566.716802          | -2238148.677           |
| AlP       | -7005.869996        | -4396249.978         | -7005.823492       | -4396220.797        | -7005.88226           | -4396257.674           |
| BN        | -955.8823866        | -599825.2784         | -955.750189        | -599742.3232        | -955.784969           | -599764.148            |
| BP        | -4394.357226        | -2757500.906         | -4394.280444       | -2757452.724        | -4394.325707          | -2757481.127           |
| Li        | -7.489628262        | -4699.812886         | -7.489628          | -4699.812721        | -7.503031             | -4708.223231           |
| Na        | -162.2522547        | -101814.8312         | -162.252255        | -101814.8314        | -162.267338           | -101824.2961           |
| -         |                     |                      |                    |                     |                       |                        |
| K         | 599.871698850       | -376425.1898         | -599.871699        | -376425.1899        | -599.887529           | -376435.1234           |

**Cartesian Coordinates of the geometries optimized at wB97XD/6-31G(d,p)**

**Li@AlN**

|    |             |             |             |
|----|-------------|-------------|-------------|
| Al | 2.77463400  | -0.22015900 | 0.37701100  |
| Al | 1.31461800  | -1.34554500 | 2.08731200  |
| Al | 1.00488200  | 1.71442200  | 1.98511400  |
| Al | 1.04435300  | -2.49664800 | -0.75476900 |
| Al | 1.47014800  | 0.07142000  | -2.39270500 |
| Al | 1.44899000  | 2.17793900  | -1.02049900 |
| Al | -1.47011000 | -0.07127800 | 2.39415000  |
| Al | -2.77696000 | 0.22120100  | -0.37819400 |
| Al | -1.31347900 | 1.34568100  | -2.08713600 |
| Al | -1.00437400 | -1.71490000 | -1.98668000 |
| Al | -1.04331300 | 2.49717400  | 0.75429300  |
| Al | -1.45024400 | -2.17995600 | 1.02234700  |
| N  | -0.76769900 | -2.81237900 | -0.51088100 |
| N  | 2.15203900  | -1.95839600 | 0.54977900  |
| N  | 0.80938900  | -1.59626600 | -2.35857600 |
| N  | 2.13083700  | 0.31920800  | 2.03092200  |
| N  | 2.63526700  | 0.75555900  | -1.12187800 |
| N  | 0.76835300  | 2.81491000  | 0.51163900  |
| N  | -0.80886800 | 1.59582100  | 2.35767700  |
| N  | -0.42292200 | -1.60069600 | 2.45384300  |
| N  | -2.13000300 | -0.31916500 | -2.03056700 |
| N  | -2.15162100 | 1.95842100  | -0.54985000 |
| N  | -2.63327600 | -0.75455900 | 1.12072100  |
| N  | 0.42341300  | 1.60097700  | -2.45416600 |

|    |             |             |            |
|----|-------------|-------------|------------|
| Li | -0.00775300 | -0.00520400 | 0.00206500 |
|----|-------------|-------------|------------|

**Na@AlN**

|    |             |             |             |
|----|-------------|-------------|-------------|
| Al | 1.83996700  | 2.05138000  | -0.67840600 |
| Al | 0.68386700  | 2.26402700  | 1.56750300  |
| Al | -1.24507200 | 2.39807200  | -0.86843700 |
| Al | 2.50448300  | -0.24253900 | 1.31189600  |
| Al | 2.09417500  | -0.87292600 | -1.70505300 |
| Al | 0.22182800  | 0.44567300  | -2.79321000 |
| Al | -2.09437200 | 0.87280200  | 1.70493200  |
| Al | -1.83939700 | -2.05178700 | 0.67863900  |
| Al | -0.68377000 | -2.26425700 | -1.56749600 |
| Al | 1.24491400  | -2.39786300 | 0.86836600  |
| Al | -2.50445600 | 0.24281700  | -1.31228700 |
| Al | -0.22211300 | -0.44556500 | 2.79353100  |
| N  | 1.31952000  | -1.25068700 | 2.32971100  |
| N  | 2.30813700  | 1.52636800  | 1.04271600  |
| N  | 2.55814200  | -1.47981500 | -0.07532200 |
| N  | 0.30183600  | 2.93782700  | -0.12386000 |
| N  | 1.87204200  | 0.93304000  | -2.08851700 |
| N  | -1.31987100 | 1.25122200  | -2.33020500 |
| N  | -2.55808000 | 1.47986600  | 0.07522400  |
| N  | -0.52313400 | 1.37502100  | 2.56392400  |
| N  | -0.30160800 | -2.93868700 | 0.12364700  |
| N  | -2.30743800 | -1.52588800 | -1.04231600 |
| N  | -1.87213700 | -0.93313200 | 2.08855400  |

|    |             |             |             |
|----|-------------|-------------|-------------|
| N  | 0.52300600  | -1.37496000 | -2.56390800 |
| Na | -0.00032900 | 0.00008500  | 0.00025100  |

**K@AlN**

|    |             |             |             |
|----|-------------|-------------|-------------|
| Al | 0.24062800  | -2.35092300 | 1.63991000  |
| Al | 2.06071200  | -2.00298000 | -0.12875000 |
| Al | -0.82678100 | -2.41423300 | -1.32909700 |
| Al | 1.97228400  | 0.24902000  | 2.07947900  |
| Al | -1.13489800 | 0.30955700  | 2.62396800  |
| Al | -2.52707100 | -1.01241100 | 0.92954800  |
| Al | 1.13491400  | -0.30936300 | -2.62378200 |
| Al | -0.24107400 | 2.35049900  | -1.63999500 |
| Al | -2.06089400 | 2.00294100  | 0.12859200  |
| Al | 0.82701600  | 2.41438100  | 1.32897600  |
| Al | -1.97192500 | -0.24893200 | -2.07943200 |
| Al | 2.52711500  | 1.01258300  | -0.92980000 |
| N  | 2.38956000  | 1.54049300  | 0.79770000  |
| N  | 1.90939300  | -1.51350600 | 1.66720600  |
| N  | 0.45899200  | 1.16931900  | 2.67078200  |
| N  | 0.43377900  | -2.91806000 | -0.12967200 |
| N  | -1.25761300 | -1.50534500 | 2.20747100  |
| N  | -2.38946200 | -1.54047300 | -0.79792500 |
| N  | -0.45879300 | -1.16922500 | -2.67085200 |
| N  | 2.47168000  | -0.79146800 | -1.41138900 |
| N  | -0.43383000 | 2.91764500  | 0.12955100  |
| N  | -1.90986100 | 1.51362200  | -1.66747300 |

|   |             |             |             |
|---|-------------|-------------|-------------|
| N | 1.25739400  | 1.50543000  | -2.20759300 |
| N | -2.47164200 | 0.79151900  | 1.41131900  |
| K | 0.00013100  | -0.00007700 | 0.00058400  |

**Li@AlP**

|    |             |             |             |
|----|-------------|-------------|-------------|
| Al | -1.05814800 | -1.63750300 | 2.38338500  |
| Al | -2.97786500 | -0.46136600 | 0.78996500  |
| Al | -0.90945100 | 1.73353000  | 2.37799900  |
| Al | -1.07816200 | -2.85611100 | -0.74985700 |
| Al | 1.88623400  | -2.34062500 | 0.81348700  |
| Al | 1.93566500  | -0.08064700 | 2.39326600  |
| Al | -2.15302000 | 0.13155900  | -2.51970600 |
| Al | -1.93068700 | 2.36301100  | -0.76585100 |
| Al | 1.21289000  | 1.79955700  | -2.50920400 |
| Al | 3.01834600  | 0.48982300  | -0.74123200 |
| Al | 0.97308100  | -1.94855600 | -2.50108500 |
| Al | 1.08147200  | 2.80823900  | 0.79996800  |
| P  | 1.12316000  | -3.63393300 | -0.92703600 |
| P  | 2.35829100  | -0.17838700 | -2.87116800 |
| P  | 3.65373800  | -0.82160000 | 0.98321800  |
| P  | 1.32812500  | 2.02888700  | 2.97889500  |
| P  | 2.58984100  | 2.78258500  | -0.93473700 |
| P  | -1.11828300 | 3.58084100  | 0.95299900  |
| P  | -2.43536800 | 0.15643800  | 2.96779500  |
| P  | -1.01086500 | 2.11033300  | -2.89051300 |
| P  | -2.54839700 | -2.75119500 | 0.96073400  |

|    |             |             |             |
|----|-------------|-------------|-------------|
| P  | -3.70043900 | 0.84496900  | -0.95840800 |
| P  | -1.30932600 | -1.95292700 | -2.88269300 |
| P  | 1.06850100  | -2.16687900 | 2.98561200  |
| Li | 0.00357200  | 0.00039200  | -0.83174300 |

### Na@AIP

|    |             |             |             |
|----|-------------|-------------|-------------|
| Al | -1.56627300 | 1.67522500  | -2.22465400 |
| Al | -1.09124300 | -1.04144400 | -2.82112600 |
| Al | 1.83420200  | 0.86001900  | -2.46227400 |
| Al | -3.15865300 | -0.55257300 | -0.00987800 |
| Al | -1.71033600 | 2.41791900  | 1.20508800  |
| Al | 0.74183900  | 3.10169800  | -0.00396400 |
| Al | -0.73883700 | -3.11988800 | -0.00027000 |
| Al | 1.71506300  | -2.41317900 | -1.20724200 |
| Al | 1.57455200  | -1.67295900 | 2.22743200  |
| Al | 1.09431500  | 1.04508700  | 2.81390400  |
| Al | -1.84539000 | -0.86127400 | 2.47517700  |
| Al | 3.14136600  | 0.55262900  | 0.01184900  |
| P  | -3.26839600 | 0.86964500  | 1.83390800  |
| P  | 0.04184100  | -0.81046400 | 3.75726700  |
| P  | 0.24644400  | 3.09503300  | 2.27593100  |
| P  | 2.67226500  | 2.55235400  | -1.09217800 |
| P  | 3.13214100  | 0.06322900  | 2.24232000  |
| P  | 3.27080400  | -0.86703800 | -1.83473600 |
| P  | -0.04185900 | 0.81427200  | -3.76478000 |
| P  | 1.40329400  | -3.48065900 | 0.84342800  |

|    |             |             |             |
|----|-------------|-------------|-------------|
| P  | -3.12543700 | -0.06108700 | -2.23739600 |
| P  | -0.24334300 | -3.09102600 | -2.27728400 |
| P  | -2.66359500 | -2.54744000 | 1.08825100  |
| P  | -1.40060700 | 3.48517500  | -0.84480200 |
| Na | -0.02101000 | -0.01965900 | 0.00895500  |

### **K@AIP**

|    |             |             |             |
|----|-------------|-------------|-------------|
| Al | -2.21408700 | -2.47167800 | 0.17816400  |
| Al | 0.47666600  | -3.23046200 | -0.61718900 |
| Al | -1.14707000 | -0.94602300 | -2.96867700 |
| Al | 0.30131100  | -1.82643500 | 2.76139100  |
| Al | -2.41492700 | 0.56584800  | 2.21162500  |
| Al | -3.11752900 | 0.99296300  | -0.57519200 |
| Al | 3.12271600  | -0.99454600 | 0.57404700  |
| Al | 2.41369300  | -0.56558700 | -2.21272800 |
| Al | 2.21344900  | 2.47392200  | -0.18120900 |
| Al | -0.47816300 | 3.22945000  | 0.61388500  |
| Al | 1.14716400  | 0.94750500  | 2.97346300  |
| Al | -0.30208800 | 1.82449600  | -2.75642100 |
| P  | -0.82107400 | -0.03702700 | 3.75642900  |
| P  | 1.41995900  | 2.99040800  | 1.95289500  |
| P  | -2.64013500 | 2.58635700  | 1.06296000  |
| P  | -2.47441900 | 0.96620500  | -2.78260600 |
| P  | 0.55863900  | 3.51621400  | -1.45852000 |
| P  | 0.81961500  | 0.03751700  | -3.75621400 |
| P  | -1.42230100 | -2.99225200 | -1.95581600 |

|   |             |             |             |
|---|-------------|-------------|-------------|
| P | 3.67245100  | 0.80836900  | -0.80501200 |
| P | -0.55936100 | -3.51270600 | 1.45603500  |
| P | 2.63906000  | -2.58613100 | -1.06440600 |
| P | 2.47256100  | -0.96536600 | 2.78028600  |
| P | -3.67379100 | -0.80790900 | 0.80357800  |
| K | 0.00616800  | -0.00253200 | 0.00741200  |

### Li@BN

|   |             |             |             |
|---|-------------|-------------|-------------|
| B | -0.87376600 | -0.44346400 | -1.98905900 |
| B | -0.86563000 | 1.80258700  | -0.96029300 |
| B | 0.87940800  | 0.41971700  | -1.98192700 |
| B | 0.89189600  | -1.78790400 | -0.96394200 |
| B | 1.37498900  | 1.74349200  | -0.00026100 |
| B | 2.21891000  | 0.00241400  | -0.00026400 |
| B | 0.87987900  | 0.41994100  | 1.98166500  |
| B | 0.89210100  | -1.78780000 | 0.96394900  |
| B | -0.86540600 | 1.80269700  | 0.96028500  |
| B | -0.87328100 | -0.44322900 | 1.98933400  |
| B | -1.36943100 | -1.73680800 | 0.00024200  |
| B | -2.55719400 | 0.01098100  | 0.00032200  |
| N | -1.87049900 | -0.93475200 | -1.11837000 |
| N | -1.88984700 | 1.41246100  | 0.00013900  |
| N | -1.87019000 | -0.93458900 | 1.11888300  |
| N | 0.11445800  | 2.42305500  | -0.00015300 |
| N | -0.47355300 | 1.00372900  | 2.10961900  |
| N | 1.92347900  | 0.92822100  | 1.12124500  |



|    |             |             |             |
|----|-------------|-------------|-------------|
| N  | 1.92321400  | 0.92809300  | -1.12180800 |
| N  | -0.47406000 | 1.00348000  | -2.10962200 |
| N  | -0.05606600 | -2.39701300 | 0.00014300  |
| N  | 1.96604900  | -1.41550800 | -0.00014000 |
| N  | 0.51527700  | -1.01139000 | -2.11717600 |
| N  | 0.51577900  | -1.01115300 | 2.11719400  |
| Li | -0.31022200 | 0.00814100  | 0.00002400  |

**Na@BN**

|   |             |             |             |
|---|-------------|-------------|-------------|
| B | 0.88305100  | -0.47182600 | 2.00525900  |
| B | 0.92527500  | 1.79855100  | 0.96822900  |
| B | -0.87325300 | 0.44862900  | 2.01615100  |
| B | -0.94166100 | -1.79343300 | 0.98076100  |
| B | -1.35127000 | 1.80581400  | 0.00065100  |
| B | -2.25134600 | 0.05563600  | 0.00251400  |
| B | -0.87793800 | 0.44659200  | -2.01460200 |
| B | -0.94392700 | -1.79437000 | -0.97687900 |
| B | 0.92313600  | 1.79760700  | -0.97201100 |
| B | 0.87812200  | -0.47352600 | -2.00688400 |
| B | 1.34349600  | -1.77835200 | -0.00083100 |
| B | 2.55342700  | -0.04536100 | -0.00284400 |
| N | 1.86083800  | -0.98783600 | 1.12436800  |
| N | 1.93613900  | 1.38905500  | -0.00283000 |
| N | 1.85809200  | -0.98876600 | -1.12783000 |
| N | -0.05824800 | 2.42772000  | -0.00111300 |
| N | 0.49929300  | 0.99149000  | -2.12048400 |
| N | -1.90396700 | 0.97438700  | -1.12225900 |

|    |             |             |             |
|----|-------------|-------------|-------------|
| N  | -1.90134700 | 0.97547300  | 1.12563200  |
| N  | 0.50425000  | 0.99346900  | 2.11839600  |
| N  | -0.00267500 | -2.40736400 | 0.00112900  |
| N  | -2.00067500 | -1.37035200 | 0.00293800  |
| N  | -0.53585600 | -1.00092200 | 2.12241900  |
| N  | -0.54087300 | -1.00298800 | -2.12034100 |
| Na | 0.05996900  | 0.00605800  | 0.00020500  |

**K@BN**

|   |             |             |             |
|---|-------------|-------------|-------------|
| B | -2.56918400 | 0.05638700  | 0.00003900  |
| B | -0.91919000 | -0.45585600 | -2.05151000 |
| B | -1.44340300 | -1.77532900 | 0.00004100  |
| B | -0.91914800 | -0.45579000 | 2.05154300  |
| B | 0.89037700  | -1.86517300 | -1.00030700 |
| B | 0.89039100  | -1.86516500 | 1.00028300  |
| B | 2.29369800  | -0.03015000 | 0.00000200  |
| B | 0.90708300  | 0.42380600  | 2.05940400  |
| B | 0.90706600  | 0.42381100  | -2.05940700 |
| B | 1.44784600  | 1.78852000  | 0.00000700  |
| B | -0.86987900 | 1.87976700  | 0.99207400  |
| B | -0.86992200 | 1.87973600  | -0.99212400 |
| N | -1.90180800 | 1.51159200  | -0.00001100 |
| N | -0.47199200 | 1.01982300  | -2.14979200 |
| N | 0.15493800  | 2.45302400  | -0.00003200 |
| N | 0.50275200  | -1.03072100 | -2.14894000 |
| N | 1.95907200  | 0.91229400  | -1.13412400 |
| N | 1.96209500  | -1.46159200 | -0.00001800 |

|   |             |             |             |
|---|-------------|-------------|-------------|
| N | -0.08400800 | -2.43734200 | 0.00000400  |
| N | -1.91717100 | -0.94321800 | -1.14229300 |
| N | -0.47194000 | 1.01989400  | 2.14976000  |
| N | 0.50276100  | -1.03073000 | 2.14891900  |
| N | -1.91714200 | -0.94314800 | 1.14238500  |
| N | 1.95907500  | 0.91226400  | 1.13416200  |
| K | -0.03500600 | 0.00537900  | -0.00001900 |

### **Li@BP**

|   |             |             |             |
|---|-------------|-------------|-------------|
| B | 0.62993800  | 0.73260200  | -2.53635200 |
| B | 0.99049400  | -2.03974300 | -1.48537100 |
| B | -1.41783000 | -0.45467400 | -2.27104100 |
| B | -1.37358200 | 2.17577000  | -0.85400800 |
| B | -1.51904400 | -2.24383300 | 0.11941000  |
| B | -2.67320500 | -0.18705400 | 0.42740600  |
| B | -0.62618800 | -0.72956100 | 2.52937600  |
| B | -0.98923600 | 2.03820600  | 1.48612300  |
| B | 1.37293500  | -2.17331700 | 0.85522600  |
| B | 1.41212400  | 0.45243000  | 2.26170100  |
| B | 1.51700900  | 2.23947000  | -0.11882500 |
| B | 2.66801100  | 0.18702700  | -0.42644000 |
| P | -2.67293100 | -1.32948800 | -1.12868900 |
| P | -2.20109600 | -1.49781900 | 1.76344700  |
| P | 0.11270300  | -3.18335500 | -0.20259800 |
| P | 0.25344800  | -1.10691500 | -2.98113300 |
| P | -1.16872200 | 1.43009500  | -2.60123100 |

|    |             |             |             |
|----|-------------|-------------|-------------|
| P  | 2.63836200  | -1.72148500 | -0.53173700 |
| P  | 2.20011500  | 1.49752700  | -1.76487200 |
| P  | 2.67742600  | 1.33151900  | 1.12930300  |
| P  | -0.11341200 | 3.18518100  | 0.20307300  |
| P  | -2.63756500 | 1.71990600  | 0.53163000  |
| P  | -0.25399100 | 1.10910700  | 2.98520400  |
| P  | 1.17078800  | -1.43284400 | 2.60494400  |
| Li | -0.01132400 | -0.00267900 | -0.01537800 |

### Na@BP

**# opt freq uwb97xd/6-31g(d,p) nosymm geom=connectivity**

**scf=(xqc,fermi,novaracc)**

|   |             |             |             |
|---|-------------|-------------|-------------|
| B | 2.68606000  | -0.42166900 | 0.26157000  |
| B | 1.35365500  | -0.08625900 | -2.39380400 |
| B | 2.03821300  | 1.80643900  | -0.18335700 |
| B | 1.09382200  | 0.86068600  | 2.72534700  |
| B | -0.59081000 | 2.10276700  | -1.65637900 |
| B | -0.78797400 | 2.50061000  | 0.73386500  |
| B | -2.70112400 | 0.42560500  | -0.31877600 |
| B | -1.33656800 | 0.08598800  | 2.37904600  |
| B | -0.96946700 | -0.77213800 | -2.46093600 |
| B | -2.04394000 | -1.83792800 | 0.13241200  |
| B | 0.54601500  | -2.09616500 | 1.65067800  |
| B | 0.75402600  | -2.53036700 | -0.73210300 |
| P | 0.60895400  | 3.04695600  | -0.49546700 |

|    |             |             |             |
|----|-------------|-------------|-------------|
| P  | -2.18392600 | 2.23733800  | -0.58279300 |
| P  | -0.18124900 | 0.87768400  | -3.06181500 |
| P  | 2.85187900  | 0.54578400  | -1.41082100 |
| P  | 2.56043900  | 1.03582400  | 1.46954900  |
| P  | 0.61354200  | -1.86625100 | -2.51634500 |
| P  | 2.14165900  | -2.23682300 | 0.55857700  |
| P  | -0.64205500 | -3.07714800 | 0.47664200  |
| P  | 0.18729700  | -0.87447700 | 3.02869000  |
| P  | -0.60451600 | 1.85239100  | 2.48499700  |
| P  | -2.82462300 | -0.55415900 | 1.33030100  |
| P  | -2.61557700 | -1.06539800 | -1.54218600 |
| Na | 0.04768600  | 0.04209400  | 0.12287700  |

### **K@BP**

**# opt freq uwb97xd/6-31g(d,p) nosymm geom=connectivity**

**scf=(xqc,fermi,novaracc)**

|   |             |             |             |
|---|-------------|-------------|-------------|
| B | -1.30843500 | 2.57447800  | -0.00014700 |
| B | -0.00206100 | 1.25501400  | 2.45847400  |
| B | 1.29980000  | 2.57861600  | -0.00011500 |
| B | -0.00200600 | 1.25476700  | -2.45859400 |
| B | 2.51533800  | -0.01571200 | 1.20268300  |
| B | 2.51538200  | -0.01582700 | -1.20263300 |
| B | 1.24016400  | -2.49275000 | 0.00013100  |
| B | 0.00190000  | -1.21784800 | -2.47654400 |

|   |             |             |             |
|---|-------------|-------------|-------------|
| B | 0.00183200  | -1.21757900 | 2.47668800  |
| B | -1.23207800 | -2.49710600 | 0.00012100  |
| B | -2.51516700 | -0.02402100 | -1.20267000 |
| B | -2.51520000 | -0.02388900 | 1.20259900  |
| P | 2.85760600  | 1.44211500  | -0.00003400 |
| P | 2.87439700  | -1.50125800 | 0.00010300  |
| P | 1.45816900  | 0.00922700  | 2.80913900  |
| P | -0.00463900 | 2.81797300  | 1.41127400  |
| P | -0.00460500 | 2.81784700  | -1.41156300 |
| P | -1.45834300 | 0.00460000  | 2.80918800  |
| P | -2.86248400 | 1.43276500  | -0.00011900 |
| P | -2.86925100 | -1.51058400 | 0.00004100  |
| P | -1.45825800 | 0.00430000  | -2.80921000 |
| P | 1.45823600  | 0.00893300  | -2.80910300 |
| P | 0.00462100  | -2.83848000 | -1.45300800 |
| P | 0.00460500  | -2.83833000 | 1.45328800  |
| K | 0.00009700  | 0.07750900  | 0.00000500  |

#### **AIN**

|    |             |             |             |
|----|-------------|-------------|-------------|
| AI | 2.12115200  | 1.28356900  | -1.20496200 |
| AI | 0.42173300  | 2.72036600  | -0.12871800 |
| AI | -0.62238400 | 1.09960100  | -2.44893800 |
| AI | 1.89791800  | 0.90912800  | 1.78020600  |
| AI | 2.32542500  | -1.48069300 | -0.01208500 |
| AI | 1.06091900  | -1.38398100 | -2.13324300 |
| AI | -1.06091100 | 1.38399900  | 2.13323300  |
| AI | -2.32540000 | 1.48076100  | 0.01206600  |

|    |             |             |             |
|----|-------------|-------------|-------------|
| Al | -2.12119000 | -1.28362300 | 1.20495600  |
| Al | -0.42175700 | -2.72043300 | 0.12875600  |
| Al | 0.62235600  | -1.09959100 | 2.44883600  |
| Al | -1.89786500 | -0.90910100 | -1.78010700 |
| N  | 0.41484300  | 0.69000100  | 2.85958700  |
| N  | 2.05928400  | 2.09330100  | 0.45410400  |
| N  | 2.28651700  | -0.89404900 | 1.67350500  |
| N  | 0.66616100  | 2.19817600  | -1.88389600 |
| N  | 2.51871600  | -0.42805900 | -1.51897200 |
| N  | -0.41484700 | -0.69000400 | -2.85958800 |
| N  | -2.28650300 | 0.89406700  | -1.67350700 |
| N  | -1.11205300 | 2.64208300  | 0.78179300  |
| N  | -0.66618700 | -2.19820600 | 1.88392800  |
| N  | -2.05930200 | -2.09335900 | -0.45410800 |
| N  | -2.51864800 | 0.42804500  | 1.51890200  |
| N  | 1.11202600  | -2.64200000 | -0.78175000 |

### **AIP**

|    |             |             |             |
|----|-------------|-------------|-------------|
| Al | 0.00000000  | 1.40536100  | -2.85837000 |
| Al | 0.00000000  | -1.40536100 | -2.85837000 |
| Al | 2.85912200  | 0.00000000  | -1.40523800 |
| Al | -2.85912200 | 0.00000000  | -1.40523800 |
| Al | -1.40527200 | 2.85871100  | -0.00041800 |
| Al | 1.40527200  | 2.85871100  | -0.00041800 |
| Al | -1.40527200 | -2.85871100 | -0.00041800 |
| Al | 1.40527200  | -2.85871100 | -0.00041800 |
| Al | 0.00000000  | -1.40522100 | 2.85885200  |

|    |             |             |             |
|----|-------------|-------------|-------------|
| Al | 0.00000000  | 1.40522100  | 2.85885200  |
| Al | -2.85822900 | 0.00000000  | 1.40530900  |
| Al | 2.85822900  | 0.00000000  | 1.40530900  |
| P  | -3.40129500 | 1.76828100  | 0.00016100  |
| P  | -1.76832700 | 0.00000000  | 3.40160800  |
| P  | 0.00000000  | 3.40095700  | 1.76793700  |
| P  | 3.40129500  | 1.76828100  | 0.00016100  |
| P  | 1.76832700  | 0.00000000  | 3.40160800  |
| P  | 3.40129500  | -1.76828100 | 0.00016100  |
| P  | 1.76819000  | 0.00000000  | -3.40098100 |
| P  | 0.00000000  | -3.40095700 | 1.76793700  |
| P  | -1.76819000 | 0.00000000  | -3.40098100 |
| P  | 0.00000000  | -3.40179300 | -1.76864000 |
| P  | -3.40129500 | -1.76828100 | 0.00016100  |
| P  | 0.00000000  | 3.40179300  | -1.76864000 |

**BN**

|   |             |             |             |
|---|-------------|-------------|-------------|
| B | -0.19286200 | -0.67572700 | 2.06171900  |
| B | 1.16014800  | -1.79444200 | 0.42548600  |
| B | 1.41046900  | 0.26102700  | 1.63958400  |
| B | -0.56915200 | 1.59293800  | 1.37352400  |
| B | 2.07057300  | 0.14093000  | -0.66422700 |
| B | 1.23009600  | 1.78712300  | -0.20470200 |
| B | 0.19285800  | 0.67573400  | -2.06171400 |
| B | -1.16014400 | 1.79443100  | -0.42548800 |
| B | 0.56915900  | -1.59294600 | -1.37352800 |
| B | -1.41047500 | -0.26101800 | -1.63958300 |



|   |             |             |             |
|---|-------------|-------------|-------------|
| B | -2.07057400 | -0.14093300 | 0.66422800  |
| B | -1.23009300 | -1.78712700 | 0.20470000  |
| N | -1.43728500 | -1.16190900 | 1.53059100  |
| N | -0.00926900 | -2.38540200 | -0.26424500 |
| N | -2.13495400 | -0.92480600 | -0.58987400 |
| N | 1.88132600  | -1.28107700 | -0.76169000 |
| N | -0.16367700 | -0.74541000 | -2.27505000 |
| N | 1.43728700  | 1.16190500  | -1.53059300 |
| N | 2.13495500  | 0.92480200  | 0.58987200  |
| N | 1.15406700  | -1.19449600 | 1.73204300  |
| N | -1.88131800 | 1.28107200  | 0.76169000  |
| N | 0.00927200  | 2.38539000  | 0.26424100  |
| N | 0.16367600  | 0.74542300  | 2.27507600  |
| N | -1.15408200 | 1.19451400  | -1.73206100 |

**BP**

|   |             |             |             |
|---|-------------|-------------|-------------|
| B | 1.18096100  | 2.41921400  | -0.00033500 |
| B | 0.00000000  | 1.18118800  | -2.41890400 |
| B | -1.18096100 | 2.41921400  | -0.00033500 |
| B | 0.00000000  | 1.18080300  | 2.41927700  |
| B | -2.41917400 | 0.00000000  | -1.18095200 |
| B | -2.41905300 | 0.00000000  | 1.18104800  |
| B | -1.18096100 | -2.41921400 | -0.00033500 |
| B | 0.00000000  | -1.18080300 | 2.41927700  |
| B | 0.00000000  | -1.18118800 | -2.41890400 |
| B | 1.18096100  | -2.41921400 | -0.00033500 |

|   |             |             |             |
|---|-------------|-------------|-------------|
| B | 2.41905300  | 0.00000000  | 1.18104800  |
| B | 2.41917400  | 0.00000000  | -1.18095200 |
| P | -2.82554500 | 1.46037800  | 0.00010300  |
| P | -2.82554500 | -1.46037800 | 0.00010300  |
| P | -1.46025100 | 0.00000000  | -2.82538100 |
| P | 0.00000000  | 2.82617800  | -1.46068800 |
| P | 0.00000000  | 2.82506900  | 1.46010700  |
| P | 1.46025100  | 0.00000000  | -2.82538100 |
| P | 2.82554500  | 1.46037800  | 0.00010300  |
| P | 2.82554500  | -1.46037800 | 0.00010300  |
| P | 1.46046500  | 0.00000000  | 2.82582200  |
| P | -1.46046500 | 0.00000000  | 2.82582200  |
| P | 0.00000000  | -2.82506900 | 1.46010700  |
| P | 0.00000000  | -2.82617800 | -1.46068800 |
